# Supplementary material for: Collagen Type II—Chitosan Interactions as Dependent on Hydroxylation and Acetylation Inferred from Molecular Dynamics Simulations
Source: MDPI journal article supplement (doi:10.3390/molecules28010154), 2022-12-24
Supplement: s1 [file s1]

## Supplementary Information

### **Collagen Type II – Chitosan interactions as dependent on hydroxylation and acetylation inferred from molecular dynamics simulations**

Maciej Przybyłek<sup>1\*</sup>, Piotr Bełdowski<sup>2,3</sup>, D.C. Florian Wieland<sup>3</sup>

Piotr Cysewski<sup>1</sup>, Alina Sionkowska<sup>4\*</sup>

<sup>1</sup> Department of Physical Chemistry, Pharmacy Faculty, Collegium Medicum of Bydgoszcz, Nicolaus Copernicus University in Toruń, Kurpińskiego 5, 85-950 Bydgoszcz, Poland

<sup>2</sup> Institute of Mathematics and Physics, Bydgoszcz University of Science and Technology, al. Kaliskiego 7, 85-796 Bydgoszcz, Poland.

<sup>3</sup> Helmholtz-Zentrum hereon: Institute for metallic Biomaterials, Max-Planck-Straße 1, 21502 Geesthacht, Germany

<sup>4</sup> Department of Biomaterials and Cosmetics Chemistry, Faculty of Chemistry, Nicolaus Copernicus University in Toruń, Gagarin 7, 87-100 Toruń, Poland

#### Table of Contents

|                                                                                                                                                                                                                                                                                                     |    |
|-----------------------------------------------------------------------------------------------------------------------------------------------------------------------------------------------------------------------------------------------------------------------------------------------------|----|
| <b>Figure S1.</b> The oxygen atoms numbering in units of chitin.....                                                                                                                                                                                                                                | 3  |
| <b>Table S1.</b> The HYP positions presented on the collagen structures used in the study. The first letter links to the chain and the second a position in the primary structure.....                                                                                                              | 4  |
| <b>Table S2</b> Distribution of H-bonds between chitosan and collagen amino acid atoms for HD=0 and DD=1. Percentages represent the contributions of H-bonds identified between chitosan and a given amino acid residue. ....                                                                       | 7  |
| <b>Table S3</b> Distribution of H-bonds between chitosan and collagen amino acid atoms for HD=0.42 and DD=1. Percentages represent the contributions of H-bonds identified between chitosan and a given amino acid residue. The numbering of atoms is the same as in Table. S1 and Figure S1.....   | 7  |
| <b>Table S4</b> Distribution of H-bonds between chitosan and collagen amino acid atoms for HD=1 and DD=1. Percentages represent the contributions of H-bonds identified between chitosan and a given amino acid residue. The numbering of atoms is the same as in Table. S1 and Figure S1.....      | 8  |
| <b>Table S5</b> Distribution of H-bonds between chitosan and collagen amino acid atoms for HD=0 and DD=0.125. Percentages represent the contributions of H-bonds identified between chitosan and a given amino acid residue. The numbering of atoms is the same as in Table. S1 and Figure S1. .... | 8  |
| <b>Table S6</b> Distribution of H-bonds between chitosan and collagen amino acid atoms for HD=0.42 and DD=0.5. Percentages represent the contributions of H-bonds identified between chitosan and a given amino acid residue. The numbering of atoms is the same as in Table. S1 and Figure S1..... | 8  |
| <b>Table S7</b> Distribution of H-bonds between chitosan and collagen amino acid atoms for HD=1 and DD=0.125. Percentages represent the contributions of H-bonds identified between chitosan and a given amino acid residue. The numbering of atoms is the same as in Table. S1 and Figure S1. .... | 9  |
| <b>Table S8</b> H-bonds lengths [Å] between chitosan and collagen amino acid atoms for HD=0 and DD=1. The numbering of atoms is the same as in Table. S1 and Figure S1.....                                                                                                                         | 9  |
| <b>Table S9</b> H-bonds lengths [Å] between chitosan and collagen amino acid atoms for HD=0.42 and DD=1. The numbering of atoms is the same as in Table. S1 and Figure S1.....                                                                                                                      | 10 |

|                                                                                                                                                                                                |    |
|------------------------------------------------------------------------------------------------------------------------------------------------------------------------------------------------|----|
| <b>Table S10</b> H-bonds lengths [ $\text{\AA}$ ] between chitosan and collagen amino acid atoms for HD=1 and DD=1. The numbering of atoms is the same as in Table. S1 and Figure S1.....      | 10 |
| <b>Table S11</b> H-bonds lengths [ $\text{\AA}$ ] between chitosan and collagen amino acid atoms for HD=0 and DD=0.125. The numbering of atoms is the same as in Table. S1 and Figure S1.....  | 10 |
| <b>Table S12</b> H-bonds lengths [ $\text{\AA}$ ] between chitosan and collagen amino acid atoms for HD=0.42 and DD=0.5. The numbering of atoms is the same as in Table. S1 and Figure S1..... | 11 |
| <b>Table S13</b> H-bonds lengths [ $\text{\AA}$ ] between chitosan and collagen amino acid atoms for HD=1 and DD=0.125. The numbering of atoms is the same as in Table. S1 and Figure S1.....  | 11 |
| <b>Table S20</b> The H-bonds acceptor-donor frequency analysis. Values in cells represent how often chitosan in a given interaction plays the role of acceptor for HD=0 and DD=1. ....         | 14 |
| <b>Table S21</b> The H-bonds acceptor-donor frequency analysis. Values in cells represent how often chitosan in a given interaction plays the role of acceptor for HD=0.42 and DD=1. ....      | 14 |
| <b>Table S22</b> The H-bonds acceptor-donor frequency analysis. Values in cells represent how often chitosan in a given interaction plays the role of acceptor for HD=1 and DD=1. ....         | 15 |
| <b>Table S23</b> The H-bonds acceptor-donor frequency analysis. Values in cells represent how often chitosan in a given interaction plays the role of acceptor for HD=0 and DD=0.125. ....     | 15 |
| <b>Table S24</b> The H-bonds acceptor-donor frequency analysis. Values in cells represent how often chitosan in a given interaction plays the role of acceptor for HD=0.42 and DD=0.5. ....    | 16 |
| <b>Table S25</b> The H-bonds acceptor-donor frequency analysis. Values in cells represent how often chitosan in a given interaction plays the role of acceptor for HD=1 and DD=0.125. ....     | 16 |

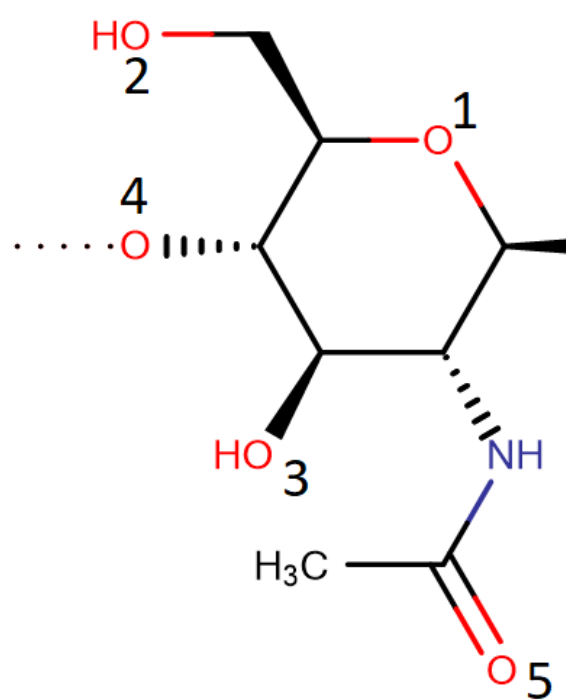

**Figure S1.** The oxygen atoms numbering in units of chitin.

**Table S1.** The HYP positions presented on the collagen structures used in the study. The first letter links to the chain and the second a position in the primary structure.

| <b>Hydroxylation degree</b> | <b>HYP position in the sequence</b>                                                                                                                                                                                                                                                                                                                                                                                                                                |
|-----------------------------|--------------------------------------------------------------------------------------------------------------------------------------------------------------------------------------------------------------------------------------------------------------------------------------------------------------------------------------------------------------------------------------------------------------------------------------------------------------------|
| <b>0.00</b>                 | No HYP residues, only PRO residues present                                                                                                                                                                                                                                                                                                                                                                                                                         |
| <b>0.14</b>                 | B8-C2-C5-C8-C23-C29<br>A2-B5-B29-C2-C8-C26<br>A5-A23-A26-B2-B5-C8<br>A2-A8-A29-B8-C2-C29<br>A2-A5-A23-B2-B5-B8<br>A8-B2-B5-B29-C2-C5<br>A2-A8-B23-C5-C23-C29<br>A2-A5-A8-A23-C26-C29<br>A26-A29-B2-B29-C2-C5<br>A2-A5-B2-B23-B29-C29                                                                                                                                                                                                                               |
| <b>0.29</b>                 | A2-A5-A23-A29-B2-B5-B23-B26-C2-C8-C23-C29<br>A5-A8-A23-A26-A29-B5-B23-C2-C5-C8-C23-C29<br>A5-A23-A26-A29-B2-B23-B29-C2-C5-C23-C26-C29<br>A2-A8-A29-B2-B23-B26-B29-C5-C8-C23-C26-C29<br>A2-A5-A8-A23-A26-A29-B2-B8-B23-B26-B29-C26<br>A2-A5-A23-B5-B8-B23-B26-C5-C8-C23-C26-C29<br>A5-A8-A23-A26-A29-B2-B5-B8-B23-B26-B29-C8<br>A2-A5-A23-A26-A29-B8-B23-B26-B29-C8-C26-C29<br>A2-A5-A23-A26-A29-B2-B26-B29-C2-C5-C8-C29<br>A2-A5-A8-A23-A26-A29-B2-B5-B8-C2-C8-C23 |
| <b>0.43</b>                 | HYP-A2-A5-A8-A23-A26-A29-B2-B5-B8-B23-B26-B29-C2-C5-C8-C23-C26-C29<br>PRO-A1-A4-A7-A14-A19-A22-A25-A28-B1-B4-B7-B14-B19-B22-B25-B28-C1-C4-C7-C14-C19-C22-C25-C28                                                                                                                                                                                                                                                                                                   |

| Hydroxylation degree | HYP position in the sequence                                                                                                                                                                                                                                                                                                                                                                                                                                                                                                                                                                                                                                                                                                                                                                                                                                                                                                                                                                                                                                                                                                        |
|----------------------|-------------------------------------------------------------------------------------------------------------------------------------------------------------------------------------------------------------------------------------------------------------------------------------------------------------------------------------------------------------------------------------------------------------------------------------------------------------------------------------------------------------------------------------------------------------------------------------------------------------------------------------------------------------------------------------------------------------------------------------------------------------------------------------------------------------------------------------------------------------------------------------------------------------------------------------------------------------------------------------------------------------------------------------------------------------------------------------------------------------------------------------|
| <b>0.57</b>          | A2-A5-A7-A8-A23-A26-A29-B1-B2-B4-B5-B7-B8-B23-B26-B28-B29-C2-C5-C8-C14-C23-C26-C29<br>A2-A5-A8-A22-A23-A26-A29-B2-B4-B5-B8-B22-B23-B26-B28-B29-C2-C5-C8-C14-C23-C26-C28-C29<br>A2-A5-A8-A19-A22-A23-A26-A29-B1-B2-B5-B7-B8-B23-B26-B29-C2-C4-C5-C8-C22-C23-C26-C29<br>A2-A5-A8-A23-A26-A29-B2-B5-B8-B14-B19-B23-B25-B26-B29-C2-C5-C8-C14-C22-C23-C25-C26-C29<br>A2-A4-A5-A7-A8-A22-A23-A26-A29-B2-B5-B8-B23-B26-B29-C2-C5-C7-C8-C23-C25-C26-C28-C29<br>A2-A5-A7-A8-A19-A23-A25-A26-A28-A29-B2-B5-B7-B8-B23-B26-B29-C2-C5-C8-C19-C23-C26-C29<br>A2-A5-A7-A8-A14-A19-A23-A26-A29-B1-B2-B4-B5-B8-B23-B26-B28-B29-C2-C5-C8-C23-C26-C29<br>A1-A2-A5-A7-A8-A23-A25-A26-A29-B2-B5-B8-B23-B25-B26-B28-B29-C2-C5-C8-C14-C23-C26-C29<br>A2-A5-A8-A14-A19-A22-A23-A26-A29-B2-B5-B8-B22-B23-B26-B29-C2-C5-C8-C19-C23-C26-C28-C29<br>A2-A5-A8-A19-A23-A25-A26-A28-A29-B1-B2-B5-B8-B19-B22-B23-B26-B29-C2-C5-C8-C23-C26-C29                                                                                                                                                                                                                       |
| <b>0.71</b>          | A1-A2-A4-A5-A8-A14-A22-A23-A26-A28-A29-B2-B4-B5-B7-B8-B22-B23-B26-B28-B29-C2-C4-C5-C8-C23-C25-C26-C28-C29<br>A2-A5-A7-A8-A14-A22-A23-A25-A26-A28-A29-B2-B5-B7-B8-B22-B23-B25-B26-B29-C1-C2-C5-C7-C8-C14-C22-C23-C26-C29<br>A1-A2-A4-A5-A8-A19-A22-A23-A26-A29-B2-B4-B5-B8-B14-B19-B23-B26-B29-C1-C2-C5-C7-C8-C19-C22-C23-C25-C26-C29<br>A2-A4-A5-A7-A8-A14-A22-A23-A25-A26-A28-A29-B1-B2-B5-B8-B22-B23-B26-B29-C1-C2-C4-C5-C8-C14-C23-C26-C28-C29<br>A1-A2-A5-A8-A14-A22-A23-A26-A29-B1-B2-B4-B5-B8-B14-B19-B23-B26-B28-B29-C2-C4-C5-C7-C8-C14-C22-C23-C26-C29<br>A1-A2-A4-A5-A8-A14-A19-A23-A25-A26-A29-B1-B2-B5-B8-B14-B22-B23-B25-B26-B29-C1-C2-C5-C8-C14-C23-C26-C28-C29<br>A2-A4-A5-A7-A8-A19-A22-A23-A26-A29-B1-B2-B5-B7-B8-B14-B19-B23-B25-B26-B28-B29-C1-C2-C5-C8-C22-C23-C26-C29<br>A2-A4-A5-A7-A8-A19-A22-A23-A26-A29-B1-B2-B4-B5-B8-B23-B25-B26-B29-C1-C2-C4-C5-C7-C8-C19-C22-C23-C26-C29<br>A2-A4-A5-A7-A8-A14-A22-A23-A25-A26-A28-A29-B2-B5-B7-B8-B14-B19-B23-B26-B29-C2-C5-C8-C19-C22-C23-C25-C26-C29<br>A1-A2-A5-A8-A14-A19-A22-A23-A25-A26-A29-B2-B5-B7-B8-B22-B23-B26-B29-C2-C5-C8-C14-C19-C22-C23-C25-C26-C28-C29 |

| Hydroxylation degree | HYP position in the sequence                                                                                                                                                                                                                                                                                                                                                                                                                                                                                                                                                                                                                                                                                                                                                                                                                                                                                                                                                                                                                                                                                                                                                                                                                                                                                                                                  |
|----------------------|---------------------------------------------------------------------------------------------------------------------------------------------------------------------------------------------------------------------------------------------------------------------------------------------------------------------------------------------------------------------------------------------------------------------------------------------------------------------------------------------------------------------------------------------------------------------------------------------------------------------------------------------------------------------------------------------------------------------------------------------------------------------------------------------------------------------------------------------------------------------------------------------------------------------------------------------------------------------------------------------------------------------------------------------------------------------------------------------------------------------------------------------------------------------------------------------------------------------------------------------------------------------------------------------------------------------------------------------------------------|
| <b>0.86</b>          | A1-A2-A4-A5-A8-A14-A22-A23-A26-A29-B2-B4-B5-B7-B8-B14-B19-B22-B23-B25-B26-B28-B29-C1-C2-C4-C5-C7-C8-C14-C19-C22-C23-C25-C26-C29<br>A1-A2-A4-A5-A7-A8-A14-A19-A22-A23-A26-A28-A29-B1-B2-B4-B5-B7-B8-B22-B23-B25-B26-B28-B29-C2-C4-C5-C7-C8-C19-C22-C23-C25-C26-C29<br>A1-A2-A5-A7-A8-A14-A19-A22-A23-A25-A26-A29-B1-B2-B4-B5-B7-B8-B14-B19-B23-B26-B28-B29-C2-C4-C5-C7-C8-C19-C22-C23-C25-C26-C28-C29<br>A1-A2-A4-A5-A7-A8-A14-A19-A22-A23-A25-A26-A28-A29-B2-B4-B5-B8-B14-B22-B23-B26-B28-B29-C1-C2-C5-C7-C8-C19-C22-C23-C25-C26-C28-C29<br>A2-A4-A5-A7-A8-A14-A22-A23-A25-A26-A28-A29-B1-B2-B5-B7-B8-B14-B23-B26-B28-B29-C1-C2-C4-C5-C7-C8-C14-C19-C22-C23-C25-C26-C28-C29<br>A2-A4-A5-A7-A8-A19-A23-A25-A26-A28-A29-B1-B2-B4-B5-B7-B8-B14-B19-B23-B25-B26-B28-B29-C1-C2-C4-C5-C7-C8-C14-C19-C23-C26-C28-C29<br>A1-A2-A5-A7-A8-A14-A19-A23-A25-A26-A29-B1-B2-B5-B7-B8-B14-B19-B23-B25-B26-B28-B29-C1-C2-C4-C5-C7-C8-C14-C19-C22-C23-C25-C26-C29<br>A2-A4-A5-A7-A8-A14-A19-A22-A23-A25-A26-A28-A29-B1-B2-B5-B8-B14-B19-B22-B23-B25-B26-B29-C1-C2-C4-C5-C8-C14-C22-C23-C25-C26-C28-C29<br>A2-A4-A5-A7-A8-A19-A22-A23-A25-A26-A28-A29-B1-B2-B4-B5-B8-B14-B19-B23-B25-B26-B28-B29-C2-C4-C5-C7-C8-C14-C22-C23-C25-C26-C28-C29<br>A1-A2-A4-A5-A8-A14-A22-A23-A25-A26-A28-A29-B1-B2-B5-B7-B8-B14-B19-B22-B23-B25-B26-B28-B29-C1-C2-C5-C7-C8-C19-C23-C25-C26-C28-C29 |
| <b>1.00</b>          | No PRO residues, only HYP residues present                                                                                                                                                                                                                                                                                                                                                                                                                                                                                                                                                                                                                                                                                                                                                                                                                                                                                                                                                                                                                                                                                                                                                                                                                                                                                                                    |

**Table S2** Distribution of H-bonds between chitosan and collagen amino acid atoms for HD=0 and DD=1. Percentages represent the contributions of H-bonds identified between chitosan and a given amino acid residue.

|    | ARG | ARG | ARG | ARG | GLU | GLU | GLU | HYP | HYP | PRO | PRO | GLY | ALA | ALA | GLN | GLN | GLN | GLN |
|----|-----|-----|-----|-----|-----|-----|-----|-----|-----|-----|-----|-----|-----|-----|-----|-----|-----|-----|
|    | N   | NH1 | NH2 | NE  | OE1 | OE2 | N   | OD1 | O   | N   | O   | O   | N   | O   | OE1 | NE2 | O   | N   |
| N  | 0%  | 33% | 0%  | 17% | 7%  | 10% | 0%  | 0%  | 0%  | 0%  | 44% | 30% | 7%  | 20% | 13% | 0%  | 13% | 0%  |
| O1 | 0%  | 0%  | 0%  | 0%  | 0%  | 0%  | 0%  | 0%  | 0%  | 0%  | 0%  | 0%  | 0%  | 0%  | 0%  | 0%  | 0%  | 0%  |
| O2 | 0%  | 50% | 0%  | 0%  | 28% | 10% | 7%  | 0%  | 0%  | 0%  | 26% | 37% | 7%  | 40% | 20% | 7%  | 7%  | 7%  |
| O3 | 0%  | 0%  | 0%  | 0%  | 14% | 17% | 0%  | 0%  | 0%  | 0%  | 26% | 26% | 20% | 7%  | 7%  | 13% | 7%  | 7%  |
| O4 | 0%  | 0%  | 0%  | 0%  | 7%  | 0%  | 0%  | 0%  | 0%  | 0%  | 4%  | 7%  | 0%  | 0%  | 0%  | 0%  | 0%  | 0%  |
| O5 | 0%  | 0%  | 0%  | 0%  | 0%  | 0%  | 0%  | 0%  | 0%  | 0%  | 0%  | 0%  | 0%  | 0%  | 0%  | 0%  | 0%  | 0%  |

ARG - NE, HH1 and NH2 guanidino group of the side chain, N - nitrogen of the amino group in the main chain, GLU - OE1 and OE2 oxygen atoms from the carboxyl group, N - nitrogen of the amino group in the main chain; HYP - OD1 - oxygen from the hydroxyl group, N - nitrogen of the amino group in the main chain; PRO - N - nitrogen of the amino group in the main chain, O - oxygen in the main chain; GLY - N - nitrogen of the amino group in the main chain, O - oxygen in the main chain; ALA - N - nitrogen of the amino group in the main chain, O - oxygen in the main chain; The numbering of atoms in Chitosan according to Fig. S1

**Table S3** Distribution of H-bonds between chitosan and collagen amino acid atoms for HD=0.42 and DD=1. Percentages represent the contributions of H-bonds identified between chitosan and a given amino acid residue. The numbering of atoms is the same as in Table. S1 and Figure S1.

|    | ARG | ARG | ARG | ARG | GLU | GLU | GLU | HYP | HYP | PRO | PRO | GLY | ALA | ALA | GLN | GLN | GLN | GLN |
|----|-----|-----|-----|-----|-----|-----|-----|-----|-----|-----|-----|-----|-----|-----|-----|-----|-----|-----|
|    | N   | NH1 | NH2 | NE  | OE1 | OE2 | N   | OD1 | O   | N   | O   | O   | N   | O   | OE1 | NE2 | O   | N   |
| N  | 17% | 0%  | 0%  | 0%  | 19% | 8%  | 3%  | 19% | 16% | 0%  | 42% | 33% | 0%  | 44% | 21% | 0%  | 5%  | 5%  |
| O1 | 0%  | 0%  | 0%  | 17% | 0%  | 0%  | 0%  | 2%  | 0%  | 0%  | 0%  | 0%  | 6%  | 0%  | 0%  | 0%  | 0%  | 0%  |
| O2 | 17% | 17% | 17% | 0%  | 6%  | 19% | 3%  | 13% | 11% | 8%  | 17% | 44% | 17% | 22% | 5%  | 5%  | 0%  | 26% |
| O3 | 0%  | 17% | 0%  | 0%  | 17% | 22% | 0%  | 16% | 21% | 0%  | 33% | 23% | 0%  | 11% | 11% | 16% | 0%  | 0%  |
| O4 | 0%  | 0%  | 0%  | 0%  | 3%  | 0%  | 0%  | 2%  | 2%  | 0%  | 0%  | 0%  | 0%  | 0%  | 0%  | 5%  | 0%  | 0%  |
| O5 | 0%  | 0%  | 0%  | 0%  | 0%  | 0%  | 0%  | 0%  | 0%  | 0%  | 0%  | 0%  | 0%  | 0%  | 0%  | 0%  | 0%  | 0%  |

**Table S4** Distribution of H-bonds between chitosan and collagen amino acid atoms for HD=1 and DD=1. Percentages represent the contributions of H-bonds identified between chitosan and a given amino acid residue. The numbering of atoms is the same as in Table. S1 and Figure S1.

|           | ARG | ARG | ARG | ARG | GLU | GLU | GLU | HYP | HYP | PRO | PRO | GLY | ALA | ALA | GLN | GLN | GLN | GLN |
|-----------|-----|-----|-----|-----|-----|-----|-----|-----|-----|-----|-----|-----|-----|-----|-----|-----|-----|-----|
|           | N   | NH1 | NH2 | NE  | OE1 | OE2 | N   | OD1 | O   | N   | O   | O   | N   | O   | OE1 | NE2 | O   | N   |
| <b>N</b>  | 9%  | 9%  | 0%  | 0%  | 14% | 7%  | 4%  | 28% | 13% | 0%  | 0%  | 34% | 6%  | 19% | 21% | 5%  | 11% | 0%  |
| <b>O1</b> | 0%  | 0%  | 0%  | 0%  | 0%  | 0%  | 0%  | 0%  | 0%  | 0%  | 0%  | 0%  | 0%  | 0%  | 0%  | 5%  | 0%  | 0%  |
| <b>O2</b> | 9%  | 9%  | 0%  | 9%  | 11% | 29% | 4%  | 21% | 12% | 0%  | 0%  | 38% | 25% | 25% | 0%  | 0%  | 21% | 21% |
| <b>O3</b> | 9%  | 9%  | 18% | 18% | 29% | 4%  | 0%  | 14% | 8%  | 0%  | 0%  | 28% | 19% | 6%  | 16% | 0%  | 0%  | 0%  |
| <b>O4</b> | 0%  | 0%  | 0%  | 0%  | 0%  | 0%  | 0%  | 2%  | 1%  | 0%  | 0%  | 0%  | 0%  | 0%  | 0%  | 0%  | 0%  | 0%  |
| <b>O5</b> | 0%  | 0%  | 0%  | 0%  | 0%  | 0%  | 0%  | 0%  | 0%  | 0%  | 0%  | 0%  | 0%  | 0%  | 0%  | 0%  | 0%  | 0%  |

**Table S5** Distribution of H-bonds between chitosan and collagen amino acid atoms for HD=0 and DD=0.125. Percentages represent the contributions of H-bonds identified between chitosan and a given amino acid residue. The numbering of atoms is the same as in Table. S1 and Figure S1.

|           | ARG | ARG | ARG | ARG | GLU | GLU | GLU | HYP | HYP | PRO | PRO | GLY | ALA | ALA | GLN | GLN | GLN | GLN |
|-----------|-----|-----|-----|-----|-----|-----|-----|-----|-----|-----|-----|-----|-----|-----|-----|-----|-----|-----|
|           | N   | NH1 | NH2 | NE  | OE1 | OE2 | N   | OD1 | O   | N   | O   | O   | N   | O   | OE1 | NE2 | O   | N   |
| <b>N</b>  | 0%  | 0%  | 0%  | 0%  | 0%  | 6%  | 0%  | 0%  | 0%  | 0%  | 10% | 7%  | 0%  | 0%  | 10% | 0%  | 0%  | 0%  |
| <b>O1</b> | 0%  | 8%  | 4%  | 0%  | 0%  | 0%  | 0%  | 0%  | 0%  | 0%  | 0%  | 0%  | 3%  | 0%  | 0%  | 0%  | 0%  | 0%  |
| <b>O2</b> | 13% | 0%  | 8%  | 8%  | 28% | 11% | 6%  | 0%  | 0%  | 7%  | 53% | 76% | 24% | 32% | 13% | 7%  | 17% | 10% |
| <b>O3</b> | 0%  | 8%  | 13% | 4%  | 0%  | 17% | 6%  | 0%  | 0%  | 7%  | 20% | 14% | 9%  | 9%  | 3%  | 13% | 3%  | 3%  |
| <b>O4</b> | 0%  | 4%  | 0%  | 0%  | 11% | 0%  | 0%  | 0%  | 0%  | 0%  | 0%  | 3%  | 0%  | 3%  | 0%  | 0%  | 0%  | 0%  |
| <b>O5</b> | 4%  | 25% | 0%  | 0%  | 0%  | 0%  | 17% | 0%  | 0%  | 3%  | 0%  | 0%  | 21% | 0%  | 0%  | 17% | 0%  | 3%  |

**Table S6** Distribution of H-bonds between chitosan and collagen amino acid atoms for HD=0.42 and DD=0.5. Percentages represent the contributions of H-bonds identified between chitosan and a given amino acid residue. The numbering of atoms is the same as in Table. S1 and Figure S1.

|           | ARG | ARG | ARG | ARG | GLU | GLU | GLU | HYP | HYP | PRO | PRO | GLY | ALA | ALA | GLN | GLN | GLN | GLN |
|-----------|-----|-----|-----|-----|-----|-----|-----|-----|-----|-----|-----|-----|-----|-----|-----|-----|-----|-----|
|           | N   | NH1 | NH2 | NE  | OE1 | OE2 | N   | OD1 | O   | N   | O   | O   | N   | O   | OE1 | NE2 | O   | N   |
| <b>N</b>  | 0%  | 0%  | 0%  | 0%  | 12% | 9%  | 0%  | 9%  | 15% | 0%  | 25% | 36% | 0%  | 21% | 15% | 0%  | 8%  | 0%  |
| <b>O1</b> | 0%  | 5%  | 0%  | 0%  | 0%  | 0%  | 0%  | 3%  | 0%  | 0%  | 0%  | 0%  | 5%  | 0%  | 0%  | 0%  | 0%  | 0%  |
| <b>O2</b> | 15% | 30% | 10% | 0%  | 30% | 0%  | 3%  | 14% | 18% | 13% | 25% | 31% | 42% | 21% | 8%  | 8%  | 8%  | 31% |



|           | ARG | ARG | ARG | ARG | GLU | GLU | GLU | HYP | HYP | PRO | PRO | GLY | ALA | ALA | GLN | GLN | GLN | GLN |
|-----------|-----|-----|-----|-----|-----|-----|-----|-----|-----|-----|-----|-----|-----|-----|-----|-----|-----|-----|
|           | N   | NH1 | NH2 | NE  | OE1 | OE2 | N   | OD1 | O   | N   | O   | O   | N   | O   | OE1 | NE2 | O   | N   |
| <b>O3</b> | 0%  | 5%  | 5%  | 0%  | 21% | 12% | 3%  | 19% | 8%  | 13% | 13% | 31% | 11% | 0%  | 0%  | 0%  | 8%  | 8%  |
| <b>O4</b> | 0%  | 0%  | 0%  | 0%  | 3%  | 3%  | 0%  | 4%  | 3%  | 0%  | 13% | 3%  | 0%  | 0%  | 0%  | 8%  | 0%  | 0%  |
| <b>O5</b> | 0%  | 15% | 10% | 5%  | 0%  | 0%  | 3%  | 9%  | 0%  | 0%  | 0%  | 0%  | 0%  | 0%  | 0%  | 0%  | 0%  | 0%  |

**Table S7** Distribution of H-bonds between chitosan and collagen amino acid atoms for HD=1 and DD=0.125. Percentages represent the contributions of H-bonds identified between chitosan and a given amino acid residue. The numbering of atoms is the same as in Table. S1 and Figure S1.

|           | ARG | ARG | ARG | ARG | GLU | GLU | GLU | HYP | HYP | PRO | PRO | GLY | ALA | ALA | GLN | GLN | GLN | GLN |
|-----------|-----|-----|-----|-----|-----|-----|-----|-----|-----|-----|-----|-----|-----|-----|-----|-----|-----|-----|
|           | N   | NH1 | NH2 | NE  | OE1 | OE2 | N   | OD1 | O   | N   | O   | O   | N   | O   | OE1 | NE2 | O   | N   |
| <b>N</b>  | 0%  | 0%  | 0%  | 0%  | 7%  | 7%  | 0%  | 9%  | 1%  | 0%  | 0%  | 9%  | 0%  | 5%  | 5%  | 0%  | 5%  | 0%  |
| <b>O1</b> | 0%  | 0%  | 0%  | 0%  | 0%  | 0%  | 0%  | 2%  | 0%  | 0%  | 0%  | 0%  | 0%  | 0%  | 0%  | 0%  | 0%  | 0%  |
| <b>O2</b> | 0%  | 9%  | 18% | 9%  | 7%  | 20% | 7%  | 24% | 14% | 0%  | 0%  | 75% | 45% | 23% | 5%  | 15% | 10% | 25% |
| <b>O3</b> | 0%  | 27% | 0%  | 0%  | 7%  | 33% | 0%  | 20% | 7%  | 0%  | 0%  | 13% | 14% | 5%  | 5%  | 0%  | 5%  | 10% |
| <b>O4</b> | 0%  | 9%  | 0%  | 0%  | 7%  | 0%  | 0%  | 3%  | 1%  | 0%  | 0%  | 3%  | 0%  | 0%  | 0%  | 0%  | 0%  | 0%  |
| <b>O5</b> | 0%  | 18% | 0%  | 9%  | 0%  | 0%  | 7%  | 17% | 0%  | 0%  | 0%  | 0%  | 9%  | 0%  | 0%  | 5%  | 0%  | 10% |

**Table S8** H-bonds lengths [Å] between chitosan and collagen amino acid atoms for HD=0 and DD=1. The numbering of atoms is the same as in Table. S1 and Figure S1.

|           | ARG | ARG  | ARG | ARG  | GLU  | GLU  | GLU  | HYP | HYP | PRO | PRO  | GLY  | ALA  | ALA  | GLN   | GLN  | GLN  | GLN  |
|-----------|-----|------|-----|------|------|------|------|-----|-----|-----|------|------|------|------|-------|------|------|------|
|           | N   | NH1  | NH2 | NE   | OE1  | OE2  | N    | OD1 | O   | N   | O    | O    | N    | O    | OE1   | NE2  | O    | N    |
| <b>N</b>  | -   | 1,89 | -   | 1,95 | 1,87 | 1,94 | -    | -   | -   | -   | 2,00 | 2,01 | 1,87 | 1,93 | 2,105 | -    | 1,91 | -    |
| <b>O1</b> | -   | -    | -   | -    | -    | -    | -    | -   | -   | -   | -    | -    | -    | -    | -     | -    | -    | -    |
| <b>O2</b> | -   | 2,06 | -   | -    | 1,70 | 1,75 | 2,04 | -   | -   | -   | 1,84 | 1,78 | 1,98 | 1,74 | 1,80  | 2,19 | 2,1  | 2,04 |
| <b>O3</b> | -   | -    | -   | -    | 1,68 | 1,81 | -    | -   | -   | -   | 1,86 | 1,86 | 2,12 | 1,54 | 1,65  | 2,09 | 1,86 | 2,32 |
| <b>O4</b> | -   | -    | -   | -    | 1,84 | -    | -    | -   | -   | -   | 1,69 | 1,64 | -    | -    | -     | -    | -    | -    |
| <b>O5</b> | -   | -    | -   | -    | -    | -    | -    | -   | -   | -   | -    | -    | -    | -    | -     | -    | -    | -    |

**Table S9** H-bonds lengths [Å] between chitosan and collagen amino acid atoms for HD=0.42 and DD=1. The numbering of atoms is the same as in Table. S1 and Figure S1.

|           | ARG  | ARG  | ARG  | ARG | GLU  | GLU  | GLU  | HYP  | HYP  | PRO  | PRO  | GLY  | ALA  | ALA  | GLN    | GLN  | GLN  | GLN  |
|-----------|------|------|------|-----|------|------|------|------|------|------|------|------|------|------|--------|------|------|------|
|           | N    | NH1  | NH2  | NE  | OE1  | OE2  | N    | OD1  | O    | N    | O    | O    | N    | O    | OE1    | NE2  | O    | N    |
| <b>N</b>  | 2,05 | -    | -    | -   | 1,98 | 1,88 | 2,2  | 2,03 | 2,05 | -    | 2,06 | 2,10 | -    | 2,06 | 2,0675 | -    | 2,26 | 1,9  |
| <b>O1</b> | -    | -    | -    | 2,1 | -    | -    | -    | 1,95 | -    | -    | -    | -    | 2,2  | -    | -      | -    | -    | -    |
| <b>O2</b> | 2,3  | 2,11 | 1,76 | -   | 1,88 | 1,70 | 2,08 | 1,99 | 1,78 | 2,08 | 1,68 | 1,83 | 2,05 | 1,93 | 1,64   | 2,29 | -    | 2,16 |
| <b>O3</b> | -    | 2,21 | -    | -   | 1,65 | 1,78 | -    | 1,79 | 1,84 | -    | 1,87 | 1,88 | -    | 1,79 | 1,765  | 2,07 | -    | -    |
| <b>O4</b> | -    | -    | -    | -   | 1,65 | -    | -    | 2,02 | 1,59 | -    | -    | -    | -    | -    | -      | 1,78 | -    | -    |
| <b>O5</b> | -    | -    | -    | -   | -    | -    | -    | -    | -    | -    | -    | -    | -    | -    | -      | -    | -    | -    |

**Table S10** H-bonds lengths [Å] between chitosan and collagen amino acid atoms for HD=1 and DD=1. The numbering of atoms is the same as in Table. S1 and Figure S1.

|           | ARG  | ARG  | ARG  | ARG  | GLU  | GLU  | GLU  | HYP  | HYP  | PRO | PRO | GLY  | ALA  | ALA  | GLN  | GLN  | GLN  | GLN  |
|-----------|------|------|------|------|------|------|------|------|------|-----|-----|------|------|------|------|------|------|------|
|           | N    | NH1  | NH2  | NE   | OE1  | OE2  | N    | OD1  | O    | N   | O   | O    | N    | O    | OE1  | NE2  | O    | N    |
| <b>N</b>  | 2,09 | 1,99 | -    | -    | 1,92 | 2,22 | 2,16 | 2,08 | 2,04 | -   | -   | 2,03 | 2,07 | 1,96 | 2,16 | 2,18 | 1,89 | -    |
| <b>O1</b> | -    | -    | -    | -    | -    | -    | -    | -    | -    | -   | -   | -    | -    | -    | -    | 1,99 | -    | -    |
| <b>O2</b> | 2,38 | 1,79 | -    | 1,85 | 1,65 | 1,82 | 1,86 | 1,86 | 1,86 | -   | -   | 1,86 | 2,07 | 1,93 | -    | -    | 1,72 | 2,16 |
| <b>O3</b> | 1,91 | 2,11 | 2,18 | 1,86 | 1,74 | 1,64 | -    | 1,93 | 1,92 | -   | -   | 1,80 | 2,03 | 2,11 | 1,72 | -    | -    | -    |
| <b>O4</b> | -    | -    | -    | -    | -    | -    | -    | 1,87 | 2,08 | -   | -   | -    | -    | -    | -    | -    | -    | -    |
| <b>O5</b> | -    | -    | -    | -    | -    | -    | -    | -    | -    | -   | -   | -    | -    | -    | -    | -    | -    | -    |

**Table S11** H-bonds lengths [Å] between chitosan and collagen amino acid atoms for HD=0 and DD=0.125. The numbering of atoms is the same as in Table. S1 and Figure S1.

|           | ARG  | ARG  | ARG  | ARG  | GLU  | GLU  | GLU  | HYP | HYP | HYP | PRO  | PRO  | GLY  | ALA  | ALA  | GLN  | GLN  | GLN  | GLN  |
|-----------|------|------|------|------|------|------|------|-----|-----|-----|------|------|------|------|------|------|------|------|------|
|           | N    | NH1  | NH2  | NE   | OE1  | OE2  | N    | OD1 | O   | N   | N    | O    | O    | N    | O    | OE1  | NE2  | O    | N    |
| <b>N</b>  | -    | -    | -    | -    | -    | 2,00 | -    | -   | -   | -   | -    | 2,16 | 2,12 | -    | -    | 2,08 | -    | -    | -    |
| <b>O1</b> | -    | 2,16 | 2,27 | -    | -    | -    | -    | -   | -   | -   | -    | -    | -    | 2,43 | -    | -    | -    | -    | -    |
| <b>O2</b> | 2,02 | -    | 1,97 | 2,29 | 1,79 | 1,69 | 2,3  | -   | -   | -   | 2,03 | 1,88 | 1,81 | 2,05 | 1,85 | 1,88 | 2,06 | 1,96 | 2,19 |
| <b>O3</b> | -    | 1,94 | 1,96 | 1,88 | -    | 1,79 | 2,00 | -   | -   | -   | 2,01 | 1,76 | 1,82 | 2,07 | 1,95 | 1,95 | 1,90 | 1,66 | 2,22 |

|           | ARG  | ARG  | ARG | ARG | GLU  | GLU | GLU  | HYP | HYP | HYP | PRO  | PRO | GLY  | ALA  | ALA  | GLN | GLN  | GLN | GLN  |
|-----------|------|------|-----|-----|------|-----|------|-----|-----|-----|------|-----|------|------|------|-----|------|-----|------|
|           | N    | NH1  | NH2 | NE  | OE1  | OE2 | N    | OD1 | O   | N   | N    | O   | O    | N    | O    | OE1 | NE2  | O   | N    |
| <b>O4</b> | -    | 1,97 | -   | -   | 1,71 | -   | -    | -   | -   | -   | -    | -   | 2,04 | -    | 1,88 | -   | -    | -   | -    |
| <b>O5</b> | 1,99 | 1,94 | -   | -   | -    | -   | 2,12 | -   | -   | -   | 1,99 | -   | -    | 2,07 | -    | -   | 2,00 | -   | 2,29 |

**Table S12** H-bonds lengths [Å] between chitosan and collagen amino acid atoms for HD=0.42 and DD=0.5. The numbering of atoms is the same as in Table. S1 and Figure S1.

|           | ARG  | ARG  | ARG  | ARG  | GLU   | GLU  | GLU  | HYP  | HYP  | PRO  | PRO  | GLY  | ALA  | ALA  | GLN  | GLN  | GLN  | GLN  |
|-----------|------|------|------|------|-------|------|------|------|------|------|------|------|------|------|------|------|------|------|
|           | N    | NH1  | NH2  | NE   | OE1   | OE2  | N    | OD1  | O    | N    | O    | O    | N    | O    | OE1  | NE2  | O    | N    |
| <b>N</b>  | -    | -    | -    | -    | 1,98  | 2,21 | -    | 2,13 | 2,07 | -    | 1,95 | 2,02 | -    | 2,02 | 1,96 | -    | 2,39 | -    |
| <b>O1</b> | -    | 2,39 | -    | -    | -     | -    | -    | 2,11 | -    | -    | -    | -    | 1,97 | -    | -    | -    | -    | -    |
| <b>O2</b> | 2,18 | 2,01 | 2,01 | -    | 1,705 | -    | 2,18 | 1,88 | 1,92 | 2,09 | 1,8  | 1,85 | 2,06 | 1,85 | 1,74 | 2,03 | 1,83 | 2,01 |
| <b>O3</b> | -    | 2,38 | 2,04 | -    | 1,74  | 1,83 | 2,23 | 1,95 | 1,87 | 1,92 | 1,71 | 1,86 | 2,05 | -    | -    | -    | 1,8  | 2,42 |
| <b>O4</b> | -    | -    | -    | -    | 1,85  | 2,08 | -    | 1,94 | 1,81 | -    | 1,87 | 1,65 | -    | -    | -    | 2,07 | -    | -    |
| <b>O5</b> | -    | 1,89 | 1,87 | 1,95 | -     | -    | 2,02 | 1,80 | -    | -    | -    | -    | -    | -    | -    | -    | -    | -    |

**Table S13** H-bonds lengths [Å] between chitosan and collagen amino acid atoms for HD=1 and DD=0.125. The numbering of atoms is the same as in Table. S1 and Figure S1.

|           | ARG | ARG  | ARG | ARG  | GLU  | GLU  | GLU  | HYP  | HYP  | PRO | PRO | GLY  | GLY  | ALA   | ALA  | GLN  | GLN  | GLN  | GLN  |
|-----------|-----|------|-----|------|------|------|------|------|------|-----|-----|------|------|-------|------|------|------|------|------|
|           | N   | NH1  | NH2 | NE   | OE1  | OE2  | N    | OD1  | O    | N   | O   | N    | O    | N     | O    | OE1  | NE2  | O    | N    |
| <b>N</b>  | -   | -    | -   | -    | 2,19 | 2,3  | -    | 2,08 | 2,24 | -   | -   | -    | 2,23 | -     | 2,27 | 2,2  | -    | 2,1  | -    |
| <b>O1</b> | -   | -    | -   | -    | -    | -    | -    | 1,91 | -    | -   | -   | -    | -    | -     | -    | -    | -    | -    | -    |
| <b>O2</b> | -   | 1,9  | 2   | 1,77 | 1,96 | 1,73 | 2,15 | 1,91 | 1,90 | -   | -   | 1,92 | 1,86 | 2,01  | 1,77 | 2,2  | 1,99 | 2,05 | 2,1  |
| <b>O3</b> | -   | 2,09 | -   | -    | 1,67 | 1,78 | -    | 1,86 | 1,85 | -   | -   | -    | 1,82 | 2,05  | 2,01 | 1,83 | -    | 1,9  | 2,01 |
| <b>O4</b> | -   | 2,26 | -   | -    | 1,73 | -    | -    | 1,75 | 1,74 | -   | -   | -    | 1,74 | -     | -    | -    | -    | -    | -    |
| <b>O5</b> | -   | 1,92 | -   | 2,19 | -    | -    | 1,98 | 1,82 | -    | -   | -   | -    | -    | 2,085 | -    | -    | 2,11 | -    | 2,05 |

**Table S14** Energies of H-bonds [kJ/mol] between chitosan and given collagen amino acid residue atom for HD=0 and DD=1. The numbering of atoms is the same as in Table. S1 and Figure S1.

|    | ARG | ARG  | ARG | ARG  | GLU  | GLU  | GLU  | HYP | HYP | PRO | PRO  | GLY  | ALA  | ALA  | GLN    | GLN  | GLN   | GLN  |
|----|-----|------|-----|------|------|------|------|-----|-----|-----|------|------|------|------|--------|------|-------|------|
|    | N   | NH1  | NH2 | NE   | OE1  | OE2  | N    | OD1 | O   | N   | O    | O    | N    | O    | OE1    | NE2  | O     | N    |
| N  | -   | 21,1 | -   | 12,1 | 18,5 | 15,5 | -    | -   | -   | -   | 19,6 | 18,1 | 21,9 | 19,4 | 15,225 | -    | 16,5  | -    |
| O1 | -   | -    | -   | -    | -    | -    | -    | -   | -   | -   | -    | -    | -    | -    | -      | -    | -     | -    |
| O2 | -   | 15,1 | -   | -    | 22,7 | 23,5 | 17,5 | -   | -   | -   | 21,1 | 23,0 | 25   | 21,8 | 18,0   | 8,65 | 19,15 | 25   |
| O3 | -   | -    | -   | -    | 24,6 | 22,3 | -    | -   | -   | -   | 20,0 | 20,5 | 16,5 | 24,4 | 21,9   | 21,6 | 24,4  | 9,38 |
| O4 | -   | -    | -   | -    | 21,5 | -    | -    | -   | -   | -   | 23,8 | 22,7 | -    | -    | -      | -    | -     | -    |
| O5 | -   | -    | -   | -    | -    | -    | -    | -   | -   | -   | -    | -    | -    | -    | -      | -    | -     | -    |

**Table S15** Energies of H-bonds [kJ/mol] between chitosan and given collagen amino acid residue atom for HD=0.42 and DD=1. The numbering of atoms is the same as in Table. S1 and Figure S1.

|    | ARG  | ARG  | ARG  | ARG  | GLU  | GLU  | GLU   | HYP  | HYP  | PRO | PRO  | GLY  | ALA   | ALA  | GLN   | GLN  | GLN  | GLN  |
|----|------|------|------|------|------|------|-------|------|------|-----|------|------|-------|------|-------|------|------|------|
|    | N    | NH1  | NH2  | NE   | OE1  | OE2  | N     | OD1  | O    | N   | O    | O    | N     | O    | 16,3  | -    | 17,1 | 21,5 |
| N  | 25   | -    | -    | -    | 17,9 | 22,9 | 9,3   | 18,1 | 14,6 | -   | 18,9 | 17,7 | -     | 19,0 | -     | -    | -    | -    |
| O1 | -    | -    | -    | 17,8 | -    | -    | -     | 24,4 | -    | -   | -    | -    | 17,78 | -    | 25    | 11,8 | -    | 18,6 |
| O2 | 15,1 | 15,3 | 22,9 | -    | 23,9 | 23   | 22,88 | 20,2 | 20,3 | 7,8 | 21,8 | 21,9 | 22,8  | 21,4 | 21,59 | 18,0 | -    | -    |
| O3 | -    | 15,6 | -    | -    | 23,3 | 22,9 | -     | 22,8 | 21,6 | -   | 18,8 | 20,2 | -     | 18,5 | -     | 25   | -    | -    |
| O4 | -    | -    | -    | -    | 23,8 | -    | -     | 19,2 | 25   | -   | -    | -    | -     | -    | -     | -    | -    | -    |
| O5 | -    | -    | -    | -    | -    | -    | -     | -    | -    | -   | -    | -    | -     | -    | 16,3  | -    | 17,1 | 21,5 |

**Table S16** Energies of H-bonds [kJ/mol] between chitosan and given collagen amino acid residue atom for HD=1 and DD=1.

|    | ARG  | ARG  | ARG  | ARG   | GLU  | GLU  | GLU  | HYP  | HYP  | PRO | PRO | GLY  | ALA  | ALA  | GLN  | GLN  | GLN  | GLN  |
|----|------|------|------|-------|------|------|------|------|------|-----|-----|------|------|------|------|------|------|------|
|    | N    | NH1  | NH2  | NE    | OE1  | OE2  | N    | OD1  | O    | N   | O   | O    | N    | O    | OE1  | NE2  | O    | N    |
| N  | 19,9 | 24,4 | -    | -     | 17,6 | 13,3 | 12,8 | 15,5 | 16,6 | -   | -   | 20,2 | 7,3  | 15,2 | 15,7 | 8,6  | 23,1 | -    |
| O1 | -    | -    | -    | -     | -    | -    | -    | -    | -    | -   | -   | -    | -    | -    | -    | 21,5 | -    | -    |
| O2 | 7,18 | 18,6 | -    | 21,1  | 23,6 | 22,7 | 13,5 | 22,2 | 20,7 | -   | -   | 20,3 | 17,6 | 16,8 | -    | -    | 22,7 | 17,4 |
| O3 | 25   | 22,0 | 10,8 | 23,44 | 23,3 | 25   | -    | 21,5 | 20,1 | -   | -   | 23,0 | 21,2 | 19,5 | 24,1 | -    | -    | -    |

|    | ARG | ARG | ARG | ARG | GLU | GLU | GLU | HYP  | HYP  | PRO | PRO | GLY | ALA | ALA | GLN | GLN | GLN | GLN |
|----|-----|-----|-----|-----|-----|-----|-----|------|------|-----|-----|-----|-----|-----|-----|-----|-----|-----|
|    | N   | NH1 | NH2 | NE  | OE1 | OE2 | N   | OD1  | O    | N   | O   | O   | N   | O   | OE1 | NE2 | O   | N   |
| O4 | -   | -   | -   | -   | -   | -   | -   | 24,2 | 21,9 | -   | -   | -   | -   | -   | -   | -   | -   | -   |
| O5 | -   | -   | -   | -   | -   | -   | -   | -    | -    | -   | -   | -   | -   | -   | -   | -   | -   | -   |

**Table S17** Energies of H-bonds [kJ/mol] between chitosan and given collagen amino acid residue atom for HD=0 and DD=0.125.

|    | ARG  | ARG  | ARG  | ARG  | GLU  | GLU  | GLU  | HYP | HYP | PRO   | PRO   | GLY  | ALA  | ALA  | GLN  | GLN  | GLN  | GLN  |
|----|------|------|------|------|------|------|------|-----|-----|-------|-------|------|------|------|------|------|------|------|
|    | N    | NH1  | NH2  | NE   | OE1  | OE2  | N    | OD1 | O   | N     | O     | O    | N    | O    | OE1  | NE2  | O    | N    |
| N  | -    | -    | -    | -    | -    | 18,6 | -    | -   | -   | -     | 18,22 | 16,6 | -    | -    | 16,9 | -    | -    | -    |
| O1 | -    | 12,3 | 11,8 | -    | -    | -    | -    | -   | -   | -     | -     | -    | 7,9  | -    | -    | -    | -    | -    |
| O2 | 17,5 | -    | 19,9 | 10,6 | 24,2 | 25   | 14,8 | -   | -   | 15,9  | 20,2  | 22,4 | 21,1 | 22,9 | 18,4 | 22,1 | 21,6 | 16,5 |
| O3 | -    | 22,5 | 19,0 | 17,2 | -    | 23,7 | 23,8 | -   | -   | 15,7  | 22,7  | 22,4 | 20,3 | 22,6 | 10,6 | 21,2 | 24,4 | 15,2 |
| O4 | -    | 21,1 | -    | -    | 23,4 | -    | -    | -   | -   | -     | -     | 13,5 | -    | 21,1 | -    | -    | -    | -    |
| O5 | 25   | 19,8 | -    | -    | -    | -    | 18,6 | -   | -   | 15,83 | -     | -    | 20,3 | -    | -    | 18,1 | -    | 13,6 |

**Table S18** Energies of H-bonds [kJ/mol] between chitosan and given collagen amino acid residue atom for HD=0.42 and DD=0.5.

|    | ARG  | ARG  | ARG  | ARG  | GLU  | GLU  | GLU  | HYP  | HYP  | PRO  | PRO  | GLY  | ALA  | ALA  | GLN  | GLN  | GLN  | GLN  |
|----|------|------|------|------|------|------|------|------|------|------|------|------|------|------|------|------|------|------|
|    | N    | NH1  | NH2  | NE   | OE1  | OE2  | N    | OD1  | O    | N    | O    | O    | N    | O    | OE1  | NE2  | O    | N    |
| N  | -    | -    | -    | -    | 14,7 | 10,9 | -    | 13,6 | 14,8 | -    | 16,4 | 16,3 | -    | 17,1 | 18,4 | -    | 8,97 | -    |
| O1 | -    | 9,7  | -    | -    | -    | -    | -    | 16,2 | -    | -    | -    | -    | 14,2 | -    | -    | -    | -    | -    |
| O2 | 17,3 | 15,1 | 19,2 | -    | 24,0 | -    | 16,9 | 20,1 | 19,4 | 7,6  | 21,9 | 23,3 | 17,4 | 23,4 | 24,4 | 25   | 25   | 18,3 |
| O3 | -    | 9,2  | 17   | -    | 23,4 | 21,8 | 18,6 | 20,6 | 21,2 | 14,5 | 18,7 | 21,8 | 20,5 | -    | -    | -    | 21,9 | 7,4  |
| O4 | -    | -    | -    | -    | 22,9 | 17,2 | -    | 23,6 | 20,1 | -    | 21,9 | 21,9 | -    | -    | -    | 17,8 | -    | -    |
| O5 | -    | 21,0 | 20,0 | 19,6 | -    | -    | 20,7 | 23,1 | -    | -    | -    | -    | -    | -    | -    | -    | -    | -    |

**Table S19** Energies of H-bonds [kJ/mol] between chitosan and given collagen amino acid residue atom for HD=1 and DD=0.125.

|    | ARG | ARG  | ARG  | ARG  | GLU  | GLU  | GLU  | HYP  | HYP  | HYP  | PRO | PRO | GLY  | ALA  | ALA  | GLN  | GLN  | GLN    | GLN  |
|----|-----|------|------|------|------|------|------|------|------|------|-----|-----|------|------|------|------|------|--------|------|
|    | N   | NH1  | NH2  | NE   | OE1  | OE2  | N    | O1   | OD1  | O    | N   | O   | O    | N    | O    | OE1  | NE2  | O      | N    |
| N  | -   | -    | -    | -    | 10,5 | 7,3  | -    | 17,9 | 14,5 | 12,8 | -   | -   | 13,8 | -    | 11,7 | 6,9  | -    | 25     | -    |
| O1 | -   | -    | -    | -    | -    | -    | -    | 16,7 | 13,1 | -    | -   | -   | -    | -    | -    | -    | -    | -      | -    |
| O2 | -   | 22,3 | 21,9 | 25   | 14,5 | 23,7 | 15,4 | 21,1 | 22,1 | 19,5 | -   | -   | 21,2 | 22,0 | 22,5 | 10,8 | 19,2 | 12,765 | 15,9 |
| O3 | -   | 14,6 | -    | -    | 25   | 23,0 | -    | 21,8 | 22,0 | 21,5 | -   | -   | 21,5 | 18,5 | 12,5 | 16,6 | -    | 25     | 23,3 |
| O4 | -   | 12,0 | -    | -    | 23,5 | -    | -    | 24,3 | 23,6 | 24,7 | -   | -   | 25   | -    | -    | -    | -    | -      | -    |
| O5 | -   | 24,2 | -    | 10,8 | -    | -    | 18,2 | 21,5 | 21,8 | -    | -   | -   | -    | 19,9 | -    | -    | 15,1 | -      | 23,3 |

**Table S20** The H-bonds acceptor-donor frequency analysis. Values in cells represent how often chitosan in a given interaction plays the role of acceptor for HD=0 and DD=1.

|    | ARG | ARG  | ARG | ARG  | GLU | GLU | GLU  | HYP | HYP | PRO | PRO | GLY | ALA  | ALA | GLN | GLN  | GLN | GLN  |
|----|-----|------|-----|------|-----|-----|------|-----|-----|-----|-----|-----|------|-----|-----|------|-----|------|
|    | N   | NH1  | NH2 | NE   | OE1 | OE2 | N    | OD1 | O   | N   | O   | O   | N    | O   | OE1 | NE2  | O   | N    |
| N  | -   | 100% | -   | 100% | 0%  | 0%  | -    | -   | -   | -   | 0%  | 0%  | 100% | 0%  | 0%  | -    | 0%  | -    |
| O1 | -   | -    | -   | -    | -   | -   | -    | -   | -   | -   | -   | -   | -    | -   | -   | -    | -   | -    |
| O2 | -   | 100% | -   | -    | 0%  | 0%  | 100% | -   | -   | -   | 0%  | 0%  | 100% | 0%  | 0%  | 100% | 0%  | 100% |
| O3 | -   | -    | -   | -    | 0%  | 0%  | -    | -   | -   | -   | 0%  | 0%  | 100% | 0%  | 0%  | 100% | 0%  | 100% |
| O4 | -   | -    | -   | -    | 0%  | -   | -    | -   | -   | -   | 0%  | 0%  | -    | -   | -   | -    | -   | -    |
| O5 | -   | -    | -   | -    | -   | -   | -    | -   | -   | -   | -   | -   | -    | -   | -   | -    | -   | -    |

**Table S21** The H-bonds acceptor-donor frequency analysis. Values in cells represent how often chitosan in a given interaction plays the role of acceptor for HD=0.42 and DD=1.

|    | ARG  | ARG  | ARG  | ARG  | GLU | GLU | GLU  | HYP  | HYP | PRO  | PRO | GLY | ALA  | ALA | GLN | GLN  | GLN | GLN  |
|----|------|------|------|------|-----|-----|------|------|-----|------|-----|-----|------|-----|-----|------|-----|------|
|    | N    | NH1  | NH2  | NE   | OE1 | OE2 | N    | OD1  | O   | N    | O   | O   | N    | O   | OE1 | NE2  | O   | N    |
| N  | 100% | -    | -    | -    | 0%  | 0%  | 100% | 0%   | 0%  | -    | 0%  | 0%  | -    | 0%  | 0%  | -    | 0%  | 100% |
| O1 | -    | -    | -    | 100% | -   | -   | -    | 100% | -   | -    | -   | -   | 100% | -   | -   | -    | -   | -    |
| O2 | 100% | 100% | 100% | -    | 0%  | 0%  | 100% | 75%  | 0%  | 100% | 0%  | 0%  | 100% | 0%  | 0%  | 100% | -   | 100% |

|    | ARG | ARG  | ARG | ARG | GLU | GLU | GLU | HYP  | HYP | PRO | PRO | GLY | ALA | ALA | GLN | GLN  | GLN | GLN |
|----|-----|------|-----|-----|-----|-----|-----|------|-----|-----|-----|-----|-----|-----|-----|------|-----|-----|
|    | N   | NH1  | NH2 | NE  | OE1 | OE2 | N   | OD1  | O   | N   | O   | O   | N   | O   | OE1 | NE2  | O   | N   |
| O3 | -   | 100% | -   | -   | 0%  | 0%  | -   | 50%  | 0%  | -   | 0%  | 0%  | -   | 0%  | 0%  | 100% | -   | -   |
| O4 | -   | -    | -   | -   | 0%  | -   | -   | 100% | 0%  | -   | -   | -   | -   | -   | -   | 100% | -   | -   |
| O5 | -   | -    | -   | -   | -   | -   | -   | -    | -   | -   | -   | -   | -   | -   | -   | -    | -   | -   |

**Table S22** The H-bonds acceptor-donor frequency analysis. Values in cells represent how often chitosan in a given interaction plays the role of acceptor for HD=1 and DD=1.

|    | ARG  | ARG  | ARG  | ARG  | GLU | GLU | GLU  | HYP | HYP | PRO | PRO | GLY | ALA  | ALA | GLN | GLN  | GLN | GLN  |
|----|------|------|------|------|-----|-----|------|-----|-----|-----|-----|-----|------|-----|-----|------|-----|------|
|    | N    | NH1  | NH2  | NE   | OE1 | OE2 | N    | OD1 | O   | N   | O   | O   | N    | O   | OE1 | NE2  | O   | N    |
| N  | 100% | 100% | -    | -    | 0%  | 0%  | 100% | 4%  | 0%  | -   | -   | 0%  | 100% | 0%  | 0%  | 100% | 0%  | -    |
| O1 | -    | -    | -    | -    | -   | -   | -    | -   | -   | -   | -   | -   | -    | -   | -   | 100% | -   | -    |
| O2 | 100% | 100% | -    | 100% | 0%  | 0%  | 100% | 57% | 0%  | -   | -   | 0%  | 100% | 0%  | -   | -    | 0%  | 100% |
| O3 | 100% | 100% | 100% | 100% | 0%  | 0%  | -    | 50% | 0%  | -   | -   | 0%  | 100% | 0%  | 0%  | -    | -   | -    |
| O4 | -    | -    | -    | -    | -   | -   | -    | 50% | 0%  | -   | -   | -   | -    | -   | -   | -    | -   | -    |
| O5 | -    | -    | -    | -    | -   | -   | -    | -   | -   | -   | -   | -   | -    | -   | -   | -    | -   | -    |

**Table S23** The H-bonds acceptor-donor frequency analysis. Values in cells represent how often chitosan in a given interaction plays the role of acceptor for HD=0 and DD=0.125.

|    | ARG  | ARG  | ARG  | ARG  | GLU | GLU | GLU  | HYP | HYP | PRO  | PRO | GLY | ALA  | ALA | GLN | GLN  | GLN | GLN  |
|----|------|------|------|------|-----|-----|------|-----|-----|------|-----|-----|------|-----|-----|------|-----|------|
|    | N    | NH1  | NH2  | NE   | OE1 | OE2 | N    | OD1 | O   | N    | O   | O   | N    | O   | OE1 | NE2  | O   | N    |
| N  | -    | -    | -    | -    | 0%  | 0%  | -    | -   | -   | -    | 0%  | 0%  | -    | 0%  | 0%  | -    | 0%  | -    |
| O1 | -    | 100% | 100% | -    | -   | -   | -    | -   | -   | -    | -   | -   | 100% | -   | -   | -    | -   | -    |
| O2 | 100% | -    | 100% | 100% | 0%  | 0%  | 100% | -   | -   | 100% | 0%  | 0%  | 100% | 0%  | 0%  | 100% | 0%  | 100% |
| O3 | -    | 100% | 100% | 100% | 0%  | 0%  | 100% | -   | -   | 100% | 0%  | 0%  | 100% | 0%  | 0%  | 100% | 0%  | 100% |
| O4 | -    | 100% | -    | -    | 0%  | -   | -    | -   | -   | -    | 0%  | 0%  | -    | -   | -   | -    | -   | -    |
| O5 | 100% | 100% | -    | -    | -   | -   | 100% | -   | -   | 100% | -   | -   | 100% | -   | -   | 100% | -   | 100% |

**Table S24** The H-bonds acceptor-donor frequency analysis. Values in cells represent how often chitosan in a given interaction plays the role of acceptor for HD=0.42 and DD=0.5.

|           | ARG  | ARG  | ARG  | ARG  | GLU | GLU | GLU  | HYP  | HYP | PRO  | PRO | GLY | ALA  | ALA | GLN | GLN  | GLN | GLN  |
|-----------|------|------|------|------|-----|-----|------|------|-----|------|-----|-----|------|-----|-----|------|-----|------|
|           | N    | NH1  | NH2  | NE   | OE1 | OE2 | N    | OD1  | O   | N    | O   | O   | N    | O   | OE1 | NE2  | O   | N    |
| <b>N</b>  | -    | -    | -    | -    | 0%  | 0%  | -    | 0%   | 0%  | -    | 0%  | 0%  | -    | 0%  | 0%  | -    | 0%  | -    |
| <b>O1</b> | -    | 100% | -    | -    | -   | -   | -    | 100% | -   | -    | -   | -   | 100% | -   | -   | -    | -   | -    |
| <b>O2</b> | 100% | 100% | 100% | -    | 0%  | -   | 100% | 36%  | 0%  | 100% | 0%  | 0%  | 100% | 0%  | 0%  | 100% | 0%  | 100% |
| <b>O3</b> | -    | 100% | 100% | -    | 0%  | 0%  | 100% | 47%  | 0%  | 100% | 0%  | 0%  | 100% | -   | -   | -    | 0%  | 100% |
| <b>O4</b> | -    | -    | -    | -    | 0%  | 0%  | -    | 67%  | 0%  | -    | 0%  | 0%  | -    | -   | -   | 100% | -   | -    |
| <b>O5</b> | -    | 100% | 100% | 100% | -   | -   | 100% | 100% | -   | -    | -   | -   | -    | -   | -   | -    | -   | -    |

**Table S25** The H-bonds acceptor-donor frequency analysis. Values in cells represent how often chitosan in a given interaction plays the role of acceptor for HD=1 and DD=0.125.

|           | ARG | ARG  | ARG  | ARG  | GLU | GLU | GLU  | HYP  | HYP | PRO | PRO | GLY | ALA  | ALA | GLN | GLN  | GLN | GLN  |
|-----------|-----|------|------|------|-----|-----|------|------|-----|-----|-----|-----|------|-----|-----|------|-----|------|
|           | N   | NH1  | NH2  | NE   | OE1 | OE2 | N    | OD1  | O   | N   | O   | O   | N    | O   | OE1 | NE2  | O   | N    |
| <b>N</b>  | -   | -    | -    | -    | 0%  | 0%  | -    | 0%   | 0%  | -   | -   | 0%  | -    | 0%  | 0%  | -    | 0%  | -    |
| <b>O1</b> | -   | -    | -    | -    | -   | -   | -    | 100% | -   | -   | -   | -   | -    | -   | -   | -    | -   | -    |
| <b>O2</b> | -   | 100% | 100% | 100% | 0%  | 0%  | 100% | 65%  | 0%  | -   | -   | 0%  | 100% | 0%  | 0%  | 100% | 0%  | 100% |
| <b>O3</b> | -   | 100% | -    | -    | 0%  | 0%  | -    | 82%  | 0%  | -   | -   | 0%  | 100% | 0%  | 0%  | -    | 0%  | 100% |
| <b>O4</b> | -   | 100% | -    | -    | 0%  | -   | -    | 75%  | 0%  | -   | -   | 0%  | -    | -   | -   | -    | -   | -    |
| <b>O5</b> | -   | 100% | -    | 100% | -   | -   | 100% | 100% | -   | -   | -   | -   | 100% | -   | -   | 100% | -   | 100% |
